# Supplementary material for: 3D Printing of Ultrathin MXene toward Tough and Thermally Resistant Nanocomposites
Source: MDPI journal article supplement (doi:10.3390/nano12162862), 2022-08-19
Supplement: s1 [file s1]

Supplementary Materials

# 3D Printing of Ultrathin MXene toward Tough and Thermally Resistant Nanocomposites

Yuewei Li <sup>1,2,\*</sup>, Ranjith Kumar Kankala <sup>1,2</sup>, Ai-Zheng Chen <sup>1,2</sup> and Shi-Bin Wang <sup>1,2,\*</sup>

<sup>1</sup> Institute of Biomaterials and Tissue Engineering, Huaqiao University, Xiamen 361021, China

<sup>2</sup> Fujian Provincial Key Laboratory of Biochemical Technology, Huaqiao University, Xiamen 361021, China

\* Correspondence: ywli@hqu.edu.cn (Y.L.), sbwang@hqu.edu.cn (S.-B.W.); Tel.: +86-592-616-2326 (S.-B.W.)

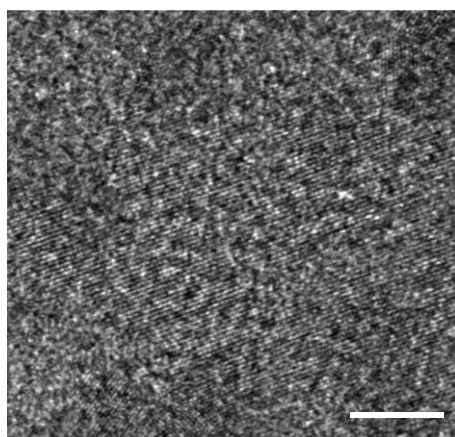

**Figure S1.** High-resolution TEM image of the exfoliated MXene nanosheets (scale bar: 5 nm).

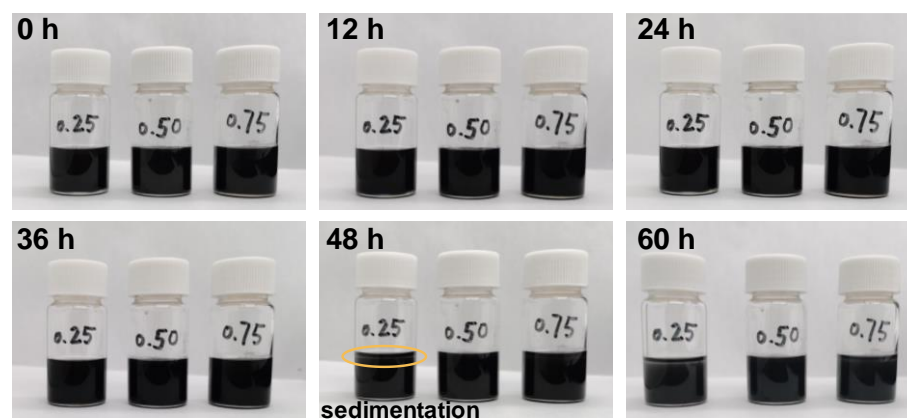

**Figure S2.** The storing stability of liquid PSR/MXene at 25 °C.

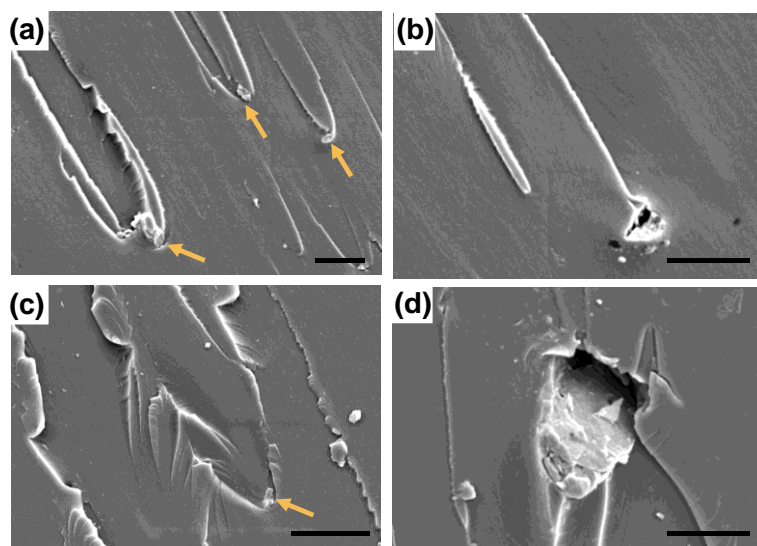

**Figure S3.** SEM micrographs of tensile fracture surfaces of the PSR/MXene nanocomposites containing (a,b) 0.5% w/w and (c,d) 0.75% w/w MXene nanosheets (scale bar: 10  $\mu\text{m}$ ).

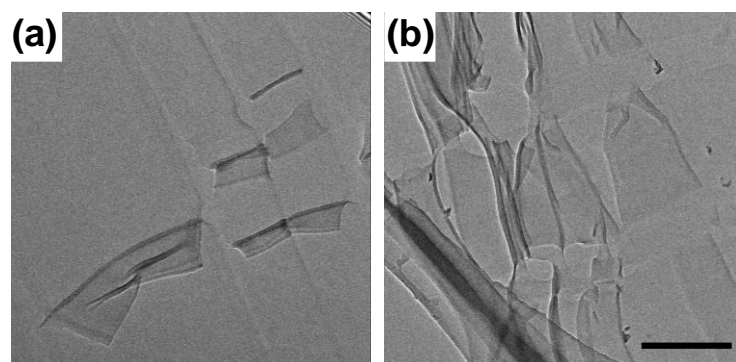

**Figure S4.** TEM images of ultrathin nanocomposites containing (a) 0.5% w/w and (b) 0.75% w/w MXene nanosheets (scale bar: 1  $\mu\text{m}$ ).
